# Supplementary material
Source: PubMed Central journal article supplement (PMC3713137)
Supplement: cc-12-1791-s01.pdf [file cc-12-1791-s01.pdf]

## **Supplemental Material to:**

**Tania Fiaschi, Elisa Giannoni, Maira Letizia Taddei, Paolo Cirri, Alberto Marini, Gianfranco Pintus, Cristina Nativi, Barbara Richichi, Andrea Scozzafava, Fabrizio Carta, Eugenio Torre, Claudiu T. Supuran and Paola Chiarugi**

**Carbonic anhydrase IX from cancer-associated fibroblasts drives epithelial-mesenchymal transition in prostate carcinoma cells**

**2013; 12(11)**

**<http://dx.doi.org/10.4161/cc.24902>**

**<http://www.landesbioscience.com/journals/cc/article/24902>**

**Supplementary figure 1.**

**Analysis of CA IX expression in HPFs, *in vitro* activated CAFs and in CAFs isolated from human prostate carcinoma biopsy (*in vivo* activated CAFs).** *In vitro* activated CAFs were obtained culturing HPFs with CM<sup>PCa</sup> for 24 hours. CA IX expression was analyzed by immunoblot and actin was used for normalization.

**Supplementary figure 2.**

**Analysis of MMP-9 silencing in CAFs.** MMP-9 was silenced in HPFs and CAFs. The medium was recovered 72 h after MMP-9 silencing and used for zimography.

**Supplementary figure 3.**

**The addition of recombinant MMP-9 rescues EMT in PCa cells.** CA IX was silenced in HPFs and CAFs and then CM from control- and CA IX-silenced fibroblasts were collected. 100 µg of human recombinant MMP-9 (200 U/ug) were added to CA IX-silenced CM. Then, PCa cells were cultured for 72 hours with different CMs and morphological analysis of EMT undergoing cells was performed under an optical microscope.

# Supplementary figure 1

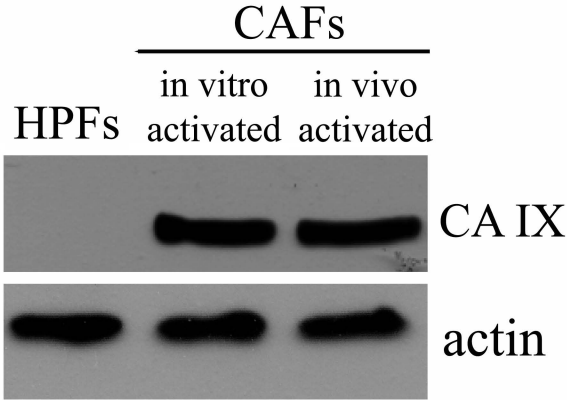

**Analysis of CA IX expression in HPFs, *in vitro* activated CAFs and in CAFs isolated from human prostate carcinoma biopsy (*in vivo* activated CAFs). *In vitro* activated CAFs were obtained culturing HPFs with CM<sup>PCa</sup> for 24 hours. CA IX expression was analyzed by immunoblot and actin was used for normalization.**

## Supplementary figure 2

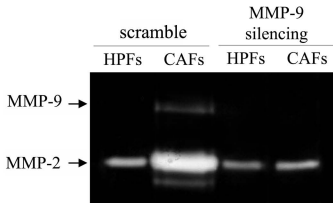

**Analysis of MMP-9 silencing in CAFs.** MMP-9 was silenced in HPFs and CAFs. The medium was recovered 72 h after MMP-9 silencing and used for zymography.

## Supplementary figure 3

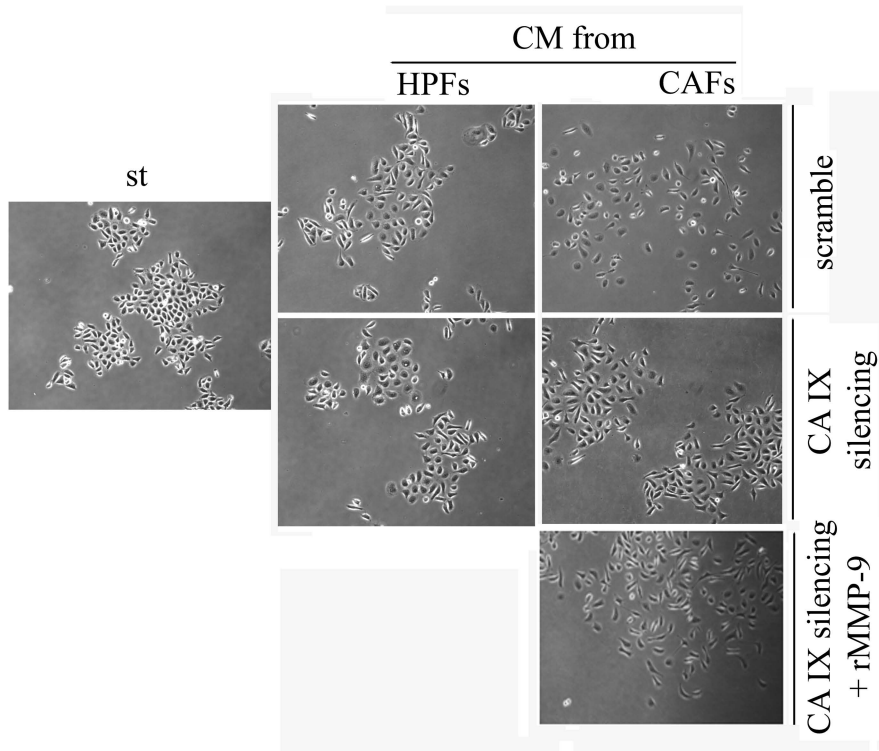

**The addition of recombinant MMP-9 rescues EMT in PCa cells.** CA IX was silenced in HPFs and CAFs and then CM from control- and CA IX-silenced fibroblasts were collected. 100  $\mu$ g of recombinant MMP-9 (200 U/ $\mu$ g) were added to CA IX-silenced CM. Then, PCa cells were cultured for 72 hours with different CMs and morphological analysis of EMT undergoing cells was performed under an optical microscope.
